# Supplementary material for: In Silico Identification of Plant miRNAs in Mammalian Breast Milk Exosomes – A Small Step Forward?
Source: PLoS One. 2014 Jun 16;9(6):e99963. doi: 10.1371/journal.pone.0099963 (PMC4059707; doi:10.1371/journal.pone.0099963)
Supplement: File S1 — Contains the following files: Table S1. The plant miRNAs identified in sample 1 of porcine breast milk exosomes collected 0 days after birth. Table S2. The plant miRNAs identified in sample 2 of porcine breast milk exosomes collected 0 days after birth. Table S3. The plant miRNAs identified in sample 3 of porcine breast milk exosomes collected 0 days after birth. Table S4. The plant miRNAs identified in sample of porcine breast milk exosomes collected 14 days after birth. Table S5. The plant miRNAs identified in sample of porcine breast milk exosomes collected 21 days after birth. Table S6. The plant miRNAs identified in sample of porcine breast milk exosomes collected 28 days after birth. Table S7. The summary list of plant-derived miRNAs identified in six samples of porcine breast milk exosomes (collected 0, 14, 21 and 28 days after birth) together with their calculated average reads counts. Table S8. Plant MIR families identified in six samples of porcine breast milk exosomes collected 0, 14, 21 and 28 days after birth. (XLS) [file pone.0099963.s001.xls]

## Sheet: Table S1
Table S1. The plant miRNAs identified in sample 1 of porcine breast milk exosomes collected 0 days after birth.
Lp.	miRNA	Query miRNA	miRNA Family	Mature Sequence	Mature Sequence Length	Reads Count
1	miR319b	ath-miR319b	MIR319	UUGGACUGAAGGGAGCUCCCU	21	24
2	miR319d	ptc-miR319d	MIR319	UUGGACUGAAGGGAGCUCCC	20	23
3	miR168a	zma-miR168a	MIR168	UCGCUUGGUGCAGAUCGGGAC	21	22
4	miR156a	zma-miR156a	MIR156	UGACAGAAGAGAGUGAGCAC	20	11
5	miR2002	tae-miR2002	MIR2002	UGAGAUGAGAUUACCCCAUAC	21	8
6	miR167	tae-miR167	MIR167	UGAAGCUGCCAGCAUGAUCUA	21	6
7	miR166a	zma-miR166a	MIR166	UCGGACCAGGCUUCAUUCCCC	21	5
8	miRf10192-akr	ptc-miRf10192-akr	MIRf10192	CGGACCAGGCUUCAUUCCCC	20	5
9	miR157	nta-miR157	MIR157	UUGACAGAAGAGAGUGAGCAC	21	3
10	miR167g	gma-miR167g	MIR167	UGAAGCUGCCAGCAUGAUCUG	21	2
11	miR167f	zma-miR167f	MIR167	UGAAGCUGCCAGCAUGAUCUG	21	2
12	miR396	oru-miR396	MIR396	UCCACAGGCUUUCUUGAACUG	21	2
13	miRf12052-akr	ptc-miRf12052-akr	MIRf12052	AUGCCUGGCUCCCUGUAUGCC	21	2
14	miR319h	ptc-miR319h	MIR319	UUGGACUGAAGGGAGCUCCU	20	1
15	miR319e	vvi-miR319e	MIR319	CUUGGACUGAAGGGAGCUCCC	21	1
16	miR159b	ptc-miR159b	MIR159	UUUGGAUUGAAGGGAGCUCUA	21	1
17	miR827a	osa-miR827a	MIR827	UUAGAUGACCAUCAGCAAACA	21	1
18	miR3711	pab-miR3711	MIR3711	UGGCGCUAGAAGGAGGGCCU	20	1

## Sheet: Table S2
Table S2. The plant miRNAs identified in sample 2 of porcine breast milk exosomes collected 0 days after birth.
Lp.	miRNA	Query miRNA	miRNA Family	Mature Sequence	Mature Sequence Length	Reads Count
1	miR168a	zma-miR168a	MIR168	UCGCUUGGUGCAGAUCGGGAC	21	11
2	miR167	pco-miR167	MIR167	UGAAGCUGCCAGCAUGAUCUU	21	8
3	miR167g	gma-miR167g	MIR167	UGAAGCUGCCAGCAUGAUCUU	21	8
4	miR1432	osa-miR1432	MIR1432	AUCAGGAGAGAUGACACCGAC	21	7
5	miR444	pvi-miR444	MIR444	UGUUGUCUCAAGCUUGCUGCC	21	7
6	miR167f	vun-miR167f	MIR167	UGAAGCUGCCAGCAUGAUCUUA	22	6
7	miR156a	zma-miR156a	MIR156	UGACAGAAGAGAGUGAGCAC	20	6
8	miR166a	ath-miR166a	MIR166	UCGGACCAGGCUUCAUUCCCC	21	5
9	miRf10192-akr	ptc-miRf10192-akr	MIRf10192	CGGACCAGGCUUCAUUCCCC	20	5
10	miR319d	ptc-miR319d	MIR319	UUGGACUGAAGGGAGCUCCC	20	4
11	miR319f	vvi-miR319f	MIR319	UUGGACUGAAGGGAGCUCCCU	21	4
12	miR396	oru-miR396	MIR396	UCCACAGGCUUUCUUGAACUG	21	4
13	miR396e	sbi-miR396e	MIR396	UUCCACAGGCUUUCUUGAACUG	22	4
14	miR3522a	gso-miR3522a	MIR3522	UGAGACCAAAUGAGCAGCUGA	21	4
15	miR157	sbi-miR157	MIR157	UUGACAGAAGAGAGUGAGCAC	21	1
16	miR444b	ssp-miR444b	MIR444	UGCAGUUGUUGCCUCAAGCUU	21	1
17	miR2002	tae-miR2002	MIR2002	UGAGAUGAGAUUACCCCAUAC	21	1

## Sheet: Table S3
Table S3. The plant miRNAs identified in sample 3 of porcine breast milk exosomes collected 0 days after birth.
Lp.	miRNA	Query miRNA	miRNA Family	Mature Sequence	Mature Sequence Length	Reads Count
1	miR166a	ath-miR166a	MIR166	UCGGACCAGGCUUCAUUCCCC	21	16
2	miRf10192-akr	ptc-miRf10192-akr	MIRf10192	CGGACCAGGCUUCAUUCCCC	20	16
3	miR159	tar-miR159	MIR159	CUUGGAUUGAAGGGAGCUCU	20	5
4	miR167g	gma-miR167g	MIR167	UGAAGCUGCCAGCAUGAUCUGA	22	3
5	miR167f	zma-miR167f	MIR167	UGAAGCUGCCAGCAUGAUCUG	21	3
6	miR168-5p	hvu-miR168-5p	MIR168	UCGCUUGGUGCAGAUCGGGAC	21	3
7	miR319a.2	vun-miR319a.2	MIR319	UUGGACUGAAGGGAGCUCCC	20	2
8	miR162m	gma-miR162m	MIR162	UCGAUAAACCUCUGCAUCCAG	21	1

## Sheet: Table S4
Table S4. The plant miRNAs identified in sample of porcine breast milk exosomes collected 14 days after birth.
Lp.	miRNA	Query miRNA	miRNA Family	Mature Sequence	Mature Sequence Length	Reads Count
1	miR167	pts-miR167	MIR167	UGAAGCUGCCAGCAUGAUCUG	21	10
2	miR167g	gma-miR167g	MIR167	UGAAGCUGCCAGCAUGAUCUG	21	8
3	miR156a	zma-miR156a	MIR156	UGACAGAAGAGAGUGAGCAC	20	7
4	miR319d	ptc-miR319d	MIR319	UUGGACUGAAGGGAGCUCCC	20	5
5	miR319b	ath-miR319b	MIR319	UUGGACUGAAGGGAGCUCCCU	21	5
6	miR168	sbi-miR168	MIR168	UCGCUUGGUGCAGAUCGGGAC	21	4
7	miR827a	osa-miR827a	MIR827	UUAGAUGACCAUCAGCAAACA	21	4
8	miR157	sbi-miR157	MIR157	UUGACAGAAGAGAGUGAGCAC	21	3
9	miR167t	zma-miR167t	MIR167	UGAAGCUGCCAGCAUGAUCUA	21	2
10	miR319g	vvi-miR319g	MIR319	UUGGACUGAAGGGAGCUCCCA	21	2
11	miR166a	ath-miR166a	MIR166	UCGGACCAGGCUUCAUUCCCC	21	2
12	miRf10192-akr	ptc-miRf10192-akr	MIRf10192	CGGACCAGGCUUCAUUCCCC	20	2
13	miR444b.1	osa-miR444b.1	MIR444	UGUUGUCUCAAGCUUGCUGCC	21	1
14	miR2002	tae-miR2002	MIR2002	UGAGAUGAGAUUACCCCAUAC	21	1

## Sheet: Table S5
Table S5. The plant miRNAs identified in sample of porcine breast milk exosomes collected 21 days after birth.
Lp.	miRNA	Query miRNA	miRNA Family	Mature Sequence	Mature Sequence Length	Reads Count
1	miR166a	ath-miR166a	MIR166	UCGGACCAGGCUUCAUUCCCC	21	10
2	miRf10192-akr	ptc-miRf10192-akr	MIRf10192	CGGACCAGGCUUCAUUCCCC	20	9
3	miR156a	zma-miR156a	MIR156	UGACAGAAGAGAGUGAGCAC	20	6
4	miR168a	zma-miR168a	MIR168	UCGCUUGGUGCAGAUCGGGAC	21	6
5	miR157	sbi-miR157	MIR157	UUGACAGAAGAGAGUGAGCAC	21	5
6	miR396	oru-miR396	MIR396	UCCACAGGCUUUCUUGAACUG	21	4
7	miR396e	sbi-miR396e	MIR396	UUCCACAGGCUUUCUUGAACUG	22	4
8	miR319d	ptc-miR319d	MIR319	UUGGACUGAAGGGAGCUCCC	20	3
9	miR167	pts-miR167	MIR167	UGAAGCUGCCAGCAUGAUCUG	21	3
10	miR159	tar-miR159	MIR159	UUGGACUGAAGGGAGCUCCCU	21	3
11	miR167d	ath-miR167d	MIR167	UGAAGCUGCCAGCAUGAUCUGG	22	3
12	miR444	pvi-miR444	MIR444	UGUUGUCUCAAGCUUGCUGCC	21	2
13	miR444b	ssp-miR444b	MIR444	UGCAGUUGUUGCCUCAAGCUU	21	1
14	miR167g	gma-miR167g	MIR167	UGAAGCUGCCAGCAUGAUCUG	21	1

## Sheet: Table S6
Table S6. The plant miRNAs identified in sample of porcine breast milk exosomes collected 28 days after birth.
Lp.	miRNA	Query miRNA	miRNA Family	Mature Sequence	Mature Sequence Length	Reads Count
1	miR168a	zma-miR168a	MIR168	UCGCUUGGUGCAGAUCGGGAC	21	11
2	miR156a	zma-miR156a	MIR156	UGACAGAAGAGAGUGAGCAC	20	10
3	miR444b.2	osa-miR444b.2	MIR444	UGCAGUUGUUGUCUCAAGCUU	21	6
4	miR319d	ptc-miR319d	MIR319	UUGGACUGAAGGGAGCUCCC	20	5
5	miR319b	ath-miR319b	MIR319	UUGGACUGAAGGGAGCUCCCU	21	5
6	miR166a	ath-miR166a	MIR166	UCGGACCAGGCUUCAUUCCCC	21	5
7	miR167	ctr-miR167	MIR167	UGAAGCUGCCAGCAUGAUCUGA	22	4
8	miRf10192-akr	ptc-miRf10192-akr	MIRf10192	CGGACCAGGCUUCAUUCCCC	20	4
9	miR168a*	osa-miR168a*	MIR168	CCCGCCUUGCACCAAGUGAAU	21	3
10	miR1432	osa-miR1432	MIR1432	AUCAGGAGAGAUGACACCGAC	21	3
11	miR162	zma-miR162	MIR162	UCGAUAAACCUCUGCAUCCA	20	2
12	miR1509a	gso-miR1509a	MIR1509	UUAAUCAAGGAAAUCACGGUCG	22	2
13	miR827a	osa-miR827a	MIR827	UUAGAUGACCAUCAGCAAACA	21	2
14	miR167f	zma-miR167f	MIR167	UGAAGCUGCCAGCAUGAUCUG	21	2
15	miR395e	bdi-miR395e	MIR395	CUGAAGUGUUUGGGGGAACUC	21	1
16	miR157	sbi-miR157	MIR157	UUGACAGAAGAGAGUGAGCAC	21	1
17	miR162m	gma-miR162m	MIR162	UCGAUAAACCUCUGCAUCCAG	21	1
18	miR2002	tae-miR2002	MIR200	UGAGAUGAGAUUACCCCAUAC	21	1
19	miR395e.1	vun-miR395e.1	MIR395	UGAAGUGUUUGGGGGAACUCU	21	1

## Sheet: Table S7
Table S7. The summary list of plant-derived miRNAs identified in six samples of porcine breast milk exosomes (collected 0, 14, 21 and 28 days after birth) together with their calculated average reads counts.
Lp.	Query miRNA	miRNA Family	Day 0 - Sample 1 (Reads Count)	Day 0 - Sample 2 (Reads Count)	Day 0 - Sample 3 (Reads Count)	Day 14 (Reads Count)	Day 21 (Reads Count)	Day 28 (Reads Count)	Average Reads Count from All Days
1	zma-miR168a	MIR168	22	11	0	0	6	11	8.33333
2	zma-miR156a	MIR156	11	6	0	7	6	10	6.66667
3	ath-miR166a	MIR166	5	5	16	0	10	5	6.83333
4	ath-miR319b	MIR319	24	0	0	5	0	5	5.66667
5	ptc-miRf10192-akr	MIRf10192	5	5	16	0	9	0	5.83333
6	ptc-miR319d	MIR319	23	0	0	5	0	5	5.5
7	gma-miR167g	MIR167	0	8	0	8	0	0	2.66667
8	pts-miR167	MIR167	0	0	0	10	0	0	1.66667
9	tar-miR159	MIR159	0	0	5	0	0	0	0.833333
10	tae-miR2002	MIR2002	8	0	0	0	0	0	1.33333
11	pco-miR167	MIR167	0	8	0	0	0	0	1.33333
12	osa-miR444b.2	MIR444	0	0	0	0	0	6	1
13	osa-miR1432	MIR1432	0	7	0	0	0	0	1.16667
14	pvi-miR444	MIR444	0	7	0	0	0	0	1.16667
15	tae-miR167	MIR167	6	0	0	0	0	0	1
16	vun-miR167f	MIR167	0	6	0	0	0	0	1
17	sbi-miR157	MIR157	0	0	0	0	5	0	0.833333

## Sheet: Table S8
Table S8. Plant MIR families identified in six samples of porcine breast milk exosomes collected 0, 14, 21 and 28 days after birth.
Lp.	miRNA family	Number of miRNA Family Members	miRNA Family Members
1	MIR167	3	miR167
			miR167g
			miR167f
2	MIR319	2	miR319b
			miR319d
3	MIR444	2	miR444
			miR444b.2
4	MIR166	1	miR166a
5	MIR156	1	miR156a
6	MIR168	1	miR168a
7	MIR1432	1	miR1432
8	MIR157	1	miR157
9	MIR159	1	miR159
10	MIR2002	1	miR2002
11	MIRf10192	1	miRf10192-akr
